# Supplementary material
Source: PubMed Central journal article supplement (PMC6172150)
Supplement: NIHMS968972-supplement-Supp_info.pdf [file NIHMS968972-supplement-Supp_info.pdf]

## **Supporting information**

### **Differential mRNA expression of neuroinflammatory modulators in the spinal cord and thalamus of type 2 diabetic monkeys**

Huiping Ding <sup>1,\*</sup>, Norikazu Kiguchi <sup>1,2,\*</sup>, Shiroh Kishioka <sup>2</sup>, Tao Ma <sup>1,3</sup>,  
Christopher M. Peters <sup>4</sup>, Mei-Chuan Ko <sup>1</sup>

<sup>1</sup> Department of Physiology & Pharmacology, Wake Forest University School of Medicine, Winston-Salem, North Carolina, USA

<sup>2</sup> Department of Pharmacology, Wakayama Medical University, Wakayama, Japan

<sup>3</sup> Department of Internal Medicine – Gerontology and Geriatric Medicine, Wake Forest University School of Medicine, Winston-Salem, North Carolina, USA

<sup>4</sup> Department of Anesthesiology, Wake Forest University School of Medicine, Winston-Salem, North Carolina, USA

\* These two authors contributed equally to this work.

Correspondence: Norikazu Kiguchi, Ph.D., Department of Pharmacology, Wakayama Medical University, Wakayama city, Wakayama 641-0012, Japan.

Email: [kiguchi@wakayama-med.ac.jp](mailto:kiguchi@wakayama-med.ac.jp)

Tel: +81-73-441-0629 / Fax: +81-73-446-3806

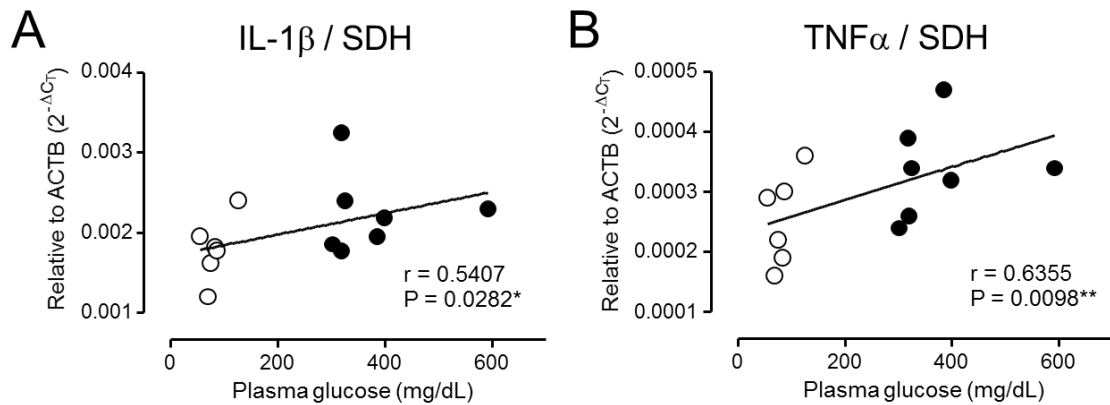

**Supplementary Figure S1. Correlation between plasma glucose levels and the expressions of pro-inflammatory cytokines in the spinal dorsal horn of monkeys.** X-axis indicates plasma glucose levels and Y-axis indicates mRNA expression levels of IL-1 $\beta$  (A) and TNF $\alpha$  (B) in the spinal dorsal horn (SDH) of all subjects. Type 2 diabetic group (n=7) and non-diabetic control group (n=6) are shown as closed circles and opened circles, respectively. Significance was determined by Pearson's correlation coefficient, \* $P < 0.05$ .

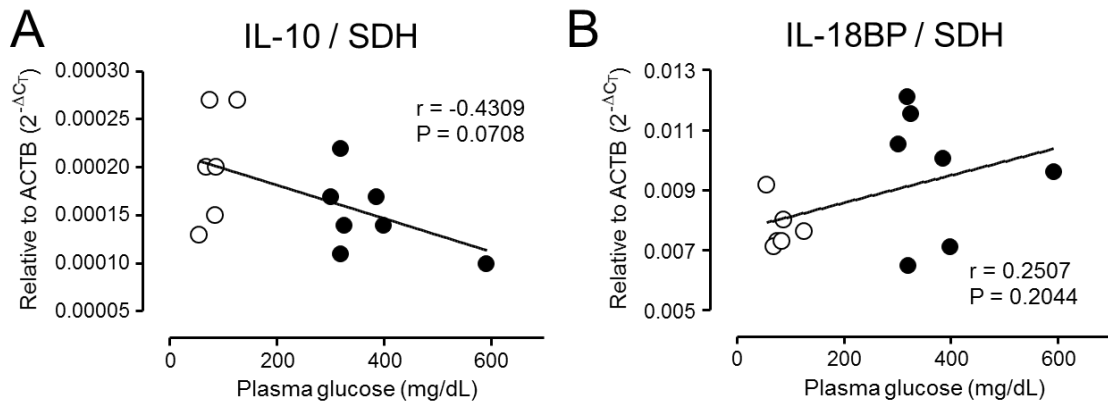

**Supplementary Figure S2. Correlation between plasma glucose levels and the expressions of anti-inflammatory cytokines in the spinal dorsal horn of monkeys.** X-axis indicates plasma glucose levels and Y-axis indicates mRNA expression levels of IL-10 (A) and IL-18BP (B) in the spinal dorsal horn (SDH) of all subjects. Type 2 diabetic group (n=7) and non-diabetic control group (n=6) are shown as closed circles and opened circles, respectively. Significance was determined by Pearson's correlation coefficient.

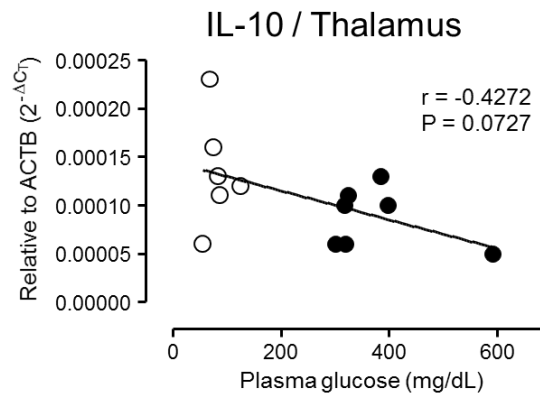

**Supplementary Figure S3. Correlation between plasma glucose levels and the expressions of interleukin-10 in the thalamus of monkeys.** X-axis indicates plasma glucose levels and Y-axis indicates mRNA expression levels of IL-10 in the thalamus of all subjects. Type 2 diabetic group (n=7) and non-diabetic control group (n=6) are shown as closed circles and opened circles, respectively. Significance was determined by Pearson's correlation coefficient.

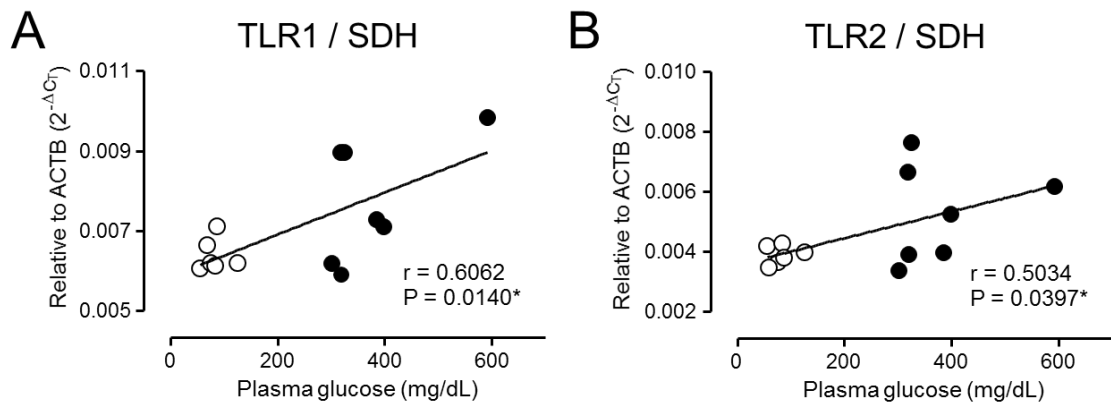

**Supplementary Figure S4. Correlation between plasma glucose levels and the expressions of toll-like receptors in the spinal dorsal horn of monkeys.** X-axis indicates plasma glucose levels and Y-axis indicates mRNA expression levels of TLR1 (A) and TLR2 (B) in the spinal dorsal horn (SDH) of all subjects. Type 2 diabetic group (n=7) and non-diabetic control group (n=6) are shown as closed circles and opened circles, respectively. Significance was determined by Pearson's correlation coefficient, \* $P < 0.05$ .
