# Supplementary material
Source: PubMed Central journal article supplement (PMC6172150)
Supplement: NIHMS968972-supplement-Supp_TableS1.pdf [file NIHMS968972-supplement-Supp_TableS1.pdf]

**Table S1.** General characteristics of non-diabetic and type 2 diabetic monkeys

| Subject      | Age<br>(Years) | Gender | Body<br>weight<br>(kg) | Duration of<br>diabetes<br>(Years) | Plasma<br>glucose<br>(mg/dL) | HbA1c<br>(%) | Cholesterol<br>(mg/dL) | Triglycerides<br>(mg/dL) |
|--------------|----------------|--------|------------------------|------------------------------------|------------------------------|--------------|------------------------|--------------------------|
| Non-diabetic |                |        |                        |                                    |                              |              |                        |                          |
| 1            | 14.7           | F      | 6.3                    | -                                  | 75                           | -            | 137                    | 62                       |
| 2            | 14.7           | F      | 7.2                    | -                                  | 69                           | -            | 117                    | 88                       |
| 3            | 15.1           | M      | 11.5                   | -                                  | 55                           | -            | 88                     | 131                      |
| 4            | 18.9           | F      | 6.3                    | -                                  | 126                          | -            | 96                     | 158                      |
| 5            | 19.2           | F      | 3.3                    | -                                  | 84                           | -            | 153                    | 159                      |
| 6            | 19.9           | F      | 4                      | -                                  | 87                           | -            | 114                    | 102                      |
| Mean         | 17.1           |        | 6.4                    |                                    | 82.7                         |              | 117.5                  | 116.7                    |
| SEM          | 1.0            |        | 1.2                    |                                    | 9.8                          |              | 10.0                   | 16.1                     |
| Diabetic     |                |        |                        |                                    |                              |              |                        |                          |
| 1            | 15.3           | F      | 4.8                    | 3.1                                | 325                          | 6            | 501                    | 980                      |
| 2            | 18.2           | F      | 5.5                    | 3.3                                | 319                          | 7.3          | 285                    | 377                      |
| 3            | 24.5           | M      | 10.5                   | 3.9                                | 301                          | 7.3          | 119                    | 242                      |
| 4            | 16.6           | F      | 5.6                    | 4.9                                | 592                          | 7.5          | 136                    | 324                      |
| 5            | 21.9           | F      | 6.3                    | 5.9                                | 385                          | 5.8          | 496                    | 1057                     |
| 6            | 21.9           | F      | 3.5                    | 6.6                                | 398                          | 6.5          | 290                    | 613                      |
| 7            | 19.4           | F      | 6.6                    | 6.8                                | 318                          | 6.9          | 282                    | 1261                     |
| Mean         | 19.7           |        | 6.1                    | 4.9                                | 376.9 *                      | 6.8          | 301.3 *                | 693.4 *                  |
| SEM          | 1.2            |        | 0.8                    | 0.6                                | 38.4                         | 0.3          | 57.6                   | 153                      |

\*  $p < 0.05$  vs. non-diabetic.
